# Supplementary material for: Bioactive Compounds of Shrimp Shell Waste from Palaemon serratus and Palaemon varians from Portuguese Coast
Source: MDPI journal article supplement (doi:10.3390/antiox12020435), 2023-02-09
Supplement: s1 [file s1]

## Supplementary Materials

# Bioactive Compounds of Shrimp Shell Waste from *Palaemon serratus* and *Palaemon varians* from Portuguese Coast

Maria Luz Maia<sup>1</sup>, Clara Grosso<sup>1</sup>, Fátima Barroso<sup>1</sup>, Aurora Silva<sup>1,2</sup>, Cristina Delerue-Matos<sup>1</sup>,  
Valentina Fernandes Domingues<sup>1</sup>

<sup>1</sup> REQUIMTE/LAQV, ISEP, Polytechnic of Porto, Dr. António Bernardino de Almeida, 4249-015 Porto, Portugal

<sup>2</sup> Nutrition and Bromatology Group, Department of Analytical and Food Chemistry, Faculty of Food Science and Technology, Ourense Campus, University of Vigo, E32004 Ourense, Spain

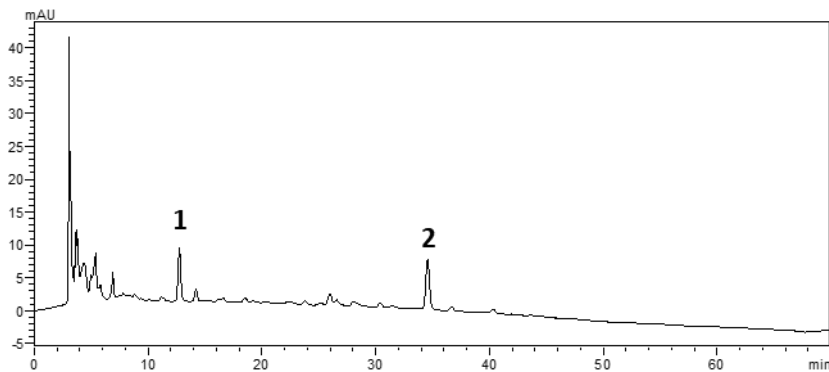

**Figure S1.** Chromatogram of the sample Vila do Conde spring containing astaxanthin (1) and  $\beta$ -carotene (2) obtained in the PDA detector.

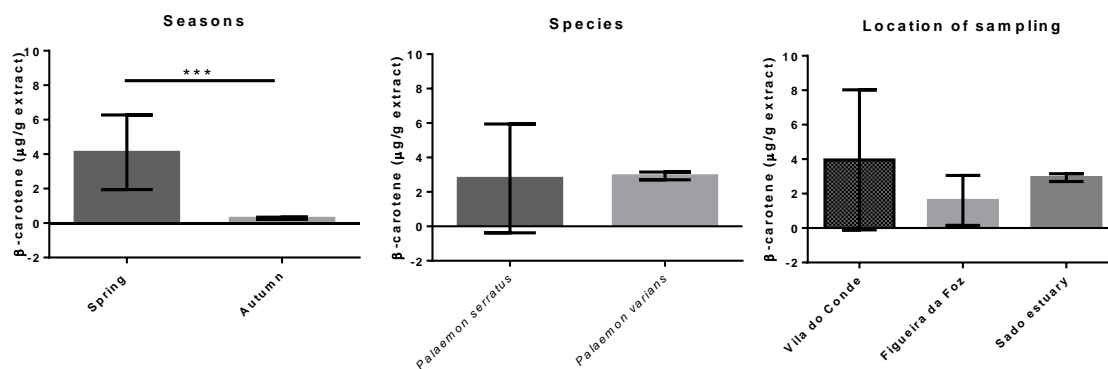

**Figure S2.** Differences of  $\beta$ -carotene content between seasons, species and locations. Columns correspond to mean of the concentration  $\pm$  SD. Significantly different, \*\*\* $p < 0.001$ .

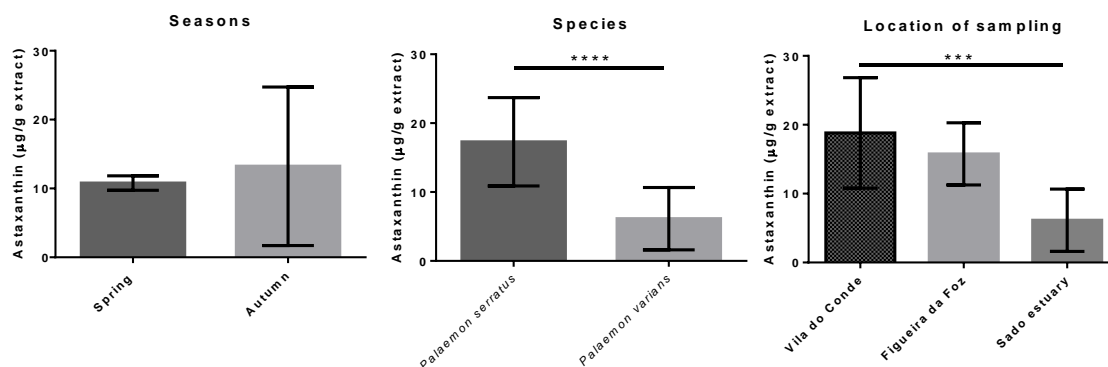

**Figure S3.** Differences of astaxanthin content between seasons, species and locations. Columns correspond to mean of the concentration  $\pm$  SD. Significantly different, \*\*\*\* $p < 0.0001$ , \*\*\* $p < 0.001$ .

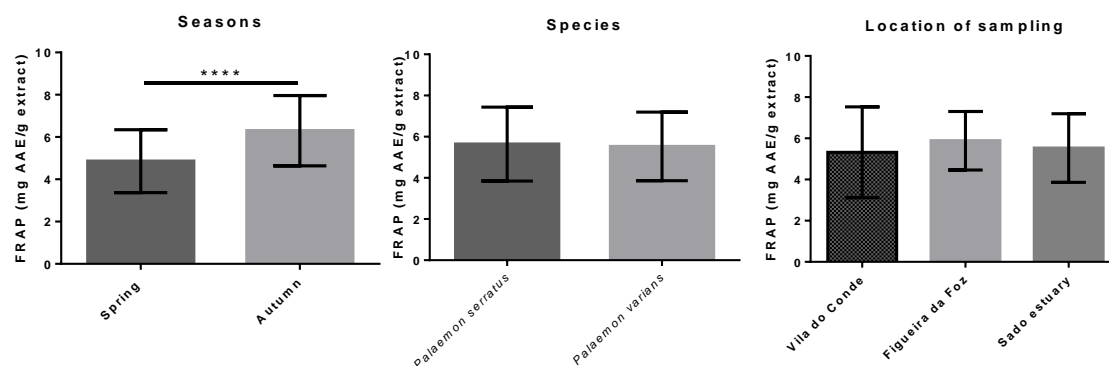

**Figure S4.** Differences of FRAP content between seasons, species and locations. Columns correspond to mean of the concentration  $\pm$  SD. Significantly different, \*\*\*\* $p < 0.0001$ .

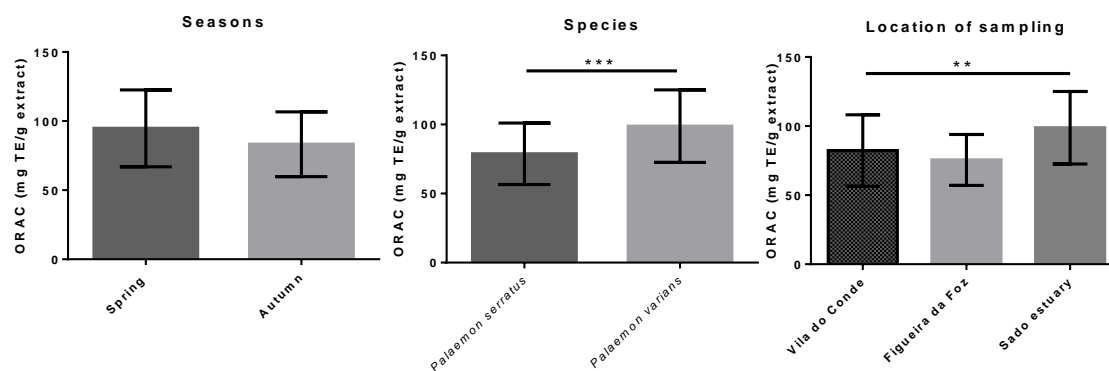

**Figure S5.** Differences of ORAC content between seasons, species and locations. Columns correspond to mean of the concentration  $\pm$  SD. Significantly different, \*\*\* $p < 0.001$ , \*\* $p < 0.01$ .

**Table S1.** Average diameter of inhibition zone (mm) of shrimp shell; (A)-aquaculture; (W)-wild.

| Location of sampling and season | Species                  | <i>E. coli</i> | <i>S. aureus</i> | <i>B. cereus</i> | <i>P. aeruginosa</i> | <i>S. enteritidis</i> |
|---------------------------------|--------------------------|----------------|------------------|------------------|----------------------|-----------------------|
| Figueira da Foz, Spring         | <i>Palaemon serratus</i> | -              | -                | -                | -                    | -                     |
| Figueira da Foz, Autumn         |                          | -              | -                | -                | -                    | -                     |
| Vila do Conde, Spring           |                          | -              | -                | -                | -                    | -                     |
| Vila do Conde, Autumn           |                          | -              | -                | -                | -                    | -                     |
| Sado estuary (A), Spring        | <i>Palaemon varians</i>  | -              | -                | 21 $\pm$ 4       | 16 $\pm$ 2           | 20 $\pm$ 3            |
| Sado estuary (A), Autumn        |                          | -              | -                | 23.3 $\pm$ 0.3   | 20 $\pm$ 1           | 18 $\pm$ 13           |
| Sado estuary (W), Spring        |                          | -              | -                | -                | 19.4 $\pm$ 0.4       | -                     |
| Sado estuary (W), Autumn        |                          | -              | -                | -                | 14 $\pm$ 4           | -                     |

**Table S2.** Positive and negative strong correlations between the elements analyzed.

| <b>Positive correlations</b> | <b>r</b> |
|------------------------------|----------|
| TPC with FRAP                | 0.78     |
| TC with astaxanthin          | 0.92     |
| <b>Negative correlations</b> |          |
| DPPH with astaxanthin        | 0.71     |
| FRAP with $\beta$ -carotene  | 0.91     |
